# Supplementary material for: USP4 promotes PTC progression by stabilizing LDHA and activating the MAPK and AKT signaling pathway
Source: publisher site journal article supplement (doi:10.18632/aging.206108), 2024-10-11
Supplement: Supplementary file [file aging-v16i19-206108-supplementary-material-SD1.pdf]

## SUPPLEMENTARY FIGURES

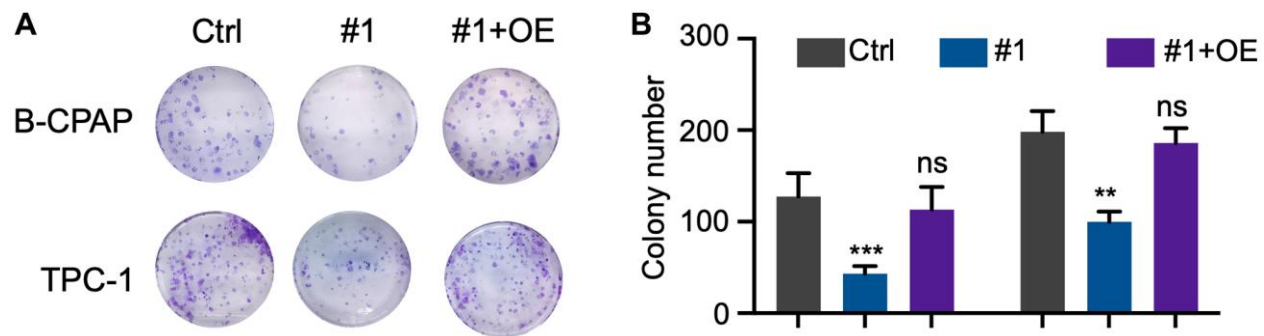

**Supplementary Figure 1. USP4 facilitates PTC progression via the MAPK and AKT pathways.** (A) Representative images from colony formation assays of B-CPAP and TPC-1 cells post USP4 knockdown and reconstruction; (B) Statistical quantification of colony formation in B-CPAP and TPC-1 cells post USP4 knockdown and reconstruction. All \* $p < 0.05$ , \*\* $p < 0.01$ , \*\*\* $p < 0.001$ , \*\*\*\* $p < 0.0001$ .

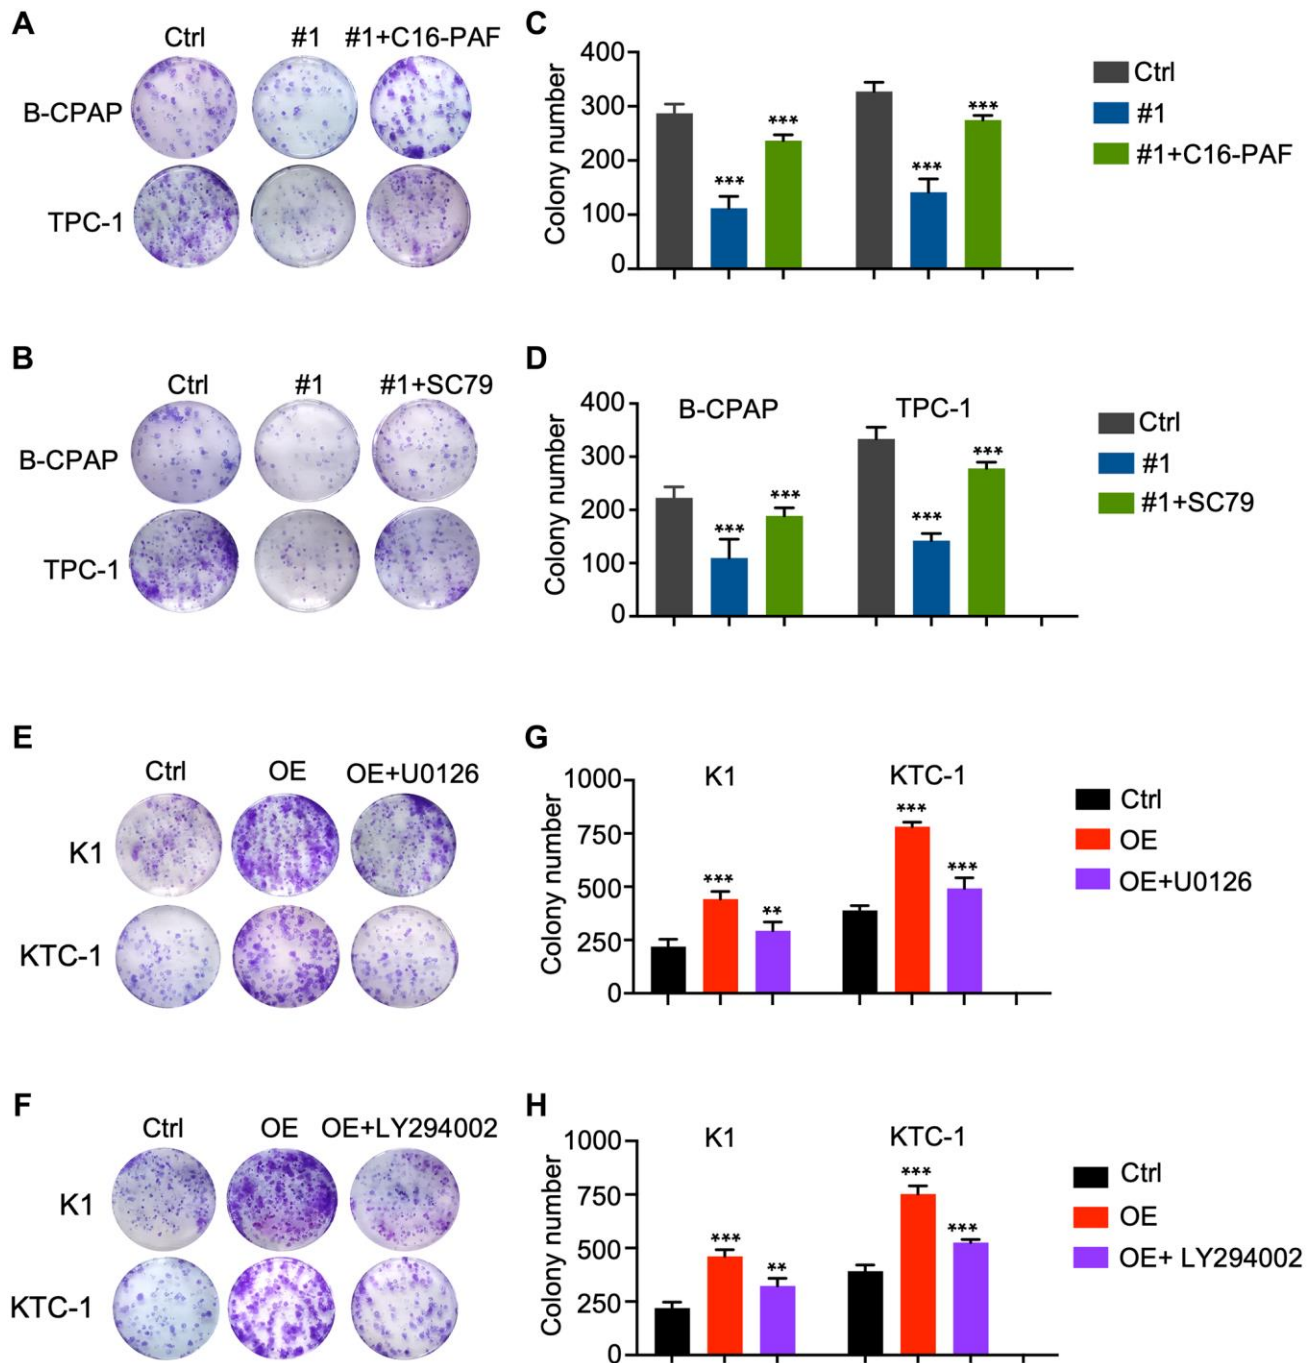

**Supplementary Figure 2. MAPK and AKT pathway inhibitors and agonists reverse the impact of USP4 in PTC.** (A, B) Representative images from colony formation assays of B-CPAP and TPC-1 cells post USP4 knockdown following C16-PAF (10  $\mu$ M for 24 h) or SC79 (4  $\mu$ g/mL for 24 h) treatment; (C, D) Statistical quantification of colony formation in B-CPAP and TPC-1 cells post USP4 knockdown following C16-PAF or SC79 treatment; (E, F) Representative images from colony formation assays of K1 and KTC-1 cells expressing USP4 following U0126 (20  $\mu$ M for 24 h) or LY294002 (50  $\mu$ M for 24 h) treatment; (G, H) Statistical quantification of colony formation in K1 and KTC-1 cells expressing USP4 following U0126 or LY294002 treatment. All \* $p < 0.05$ , \*\* $p < 0.01$ , \*\*\* $p < 0.001$ , \*\*\*\* $p < 0.0001$ .
